# Supplementary material
Source: PubMed Central journal article supplement (PMC6702147)
Supplement: mmc1.pdf [file mmc1.pdf]

**Biophysical Journal, Volume 117**

**Supplemental Information**

**NMR Structural Analysis of Isolated *Shaker* Voltage-Sensing Domain in  
LPPG Micelles**

**Hongbo Chen, Junkun Pan, Disha M. Gandhi, Chris Dockendorff, Qiang Cui, Baron  
Chanda, and Katherine A. Henzler-Wildman**

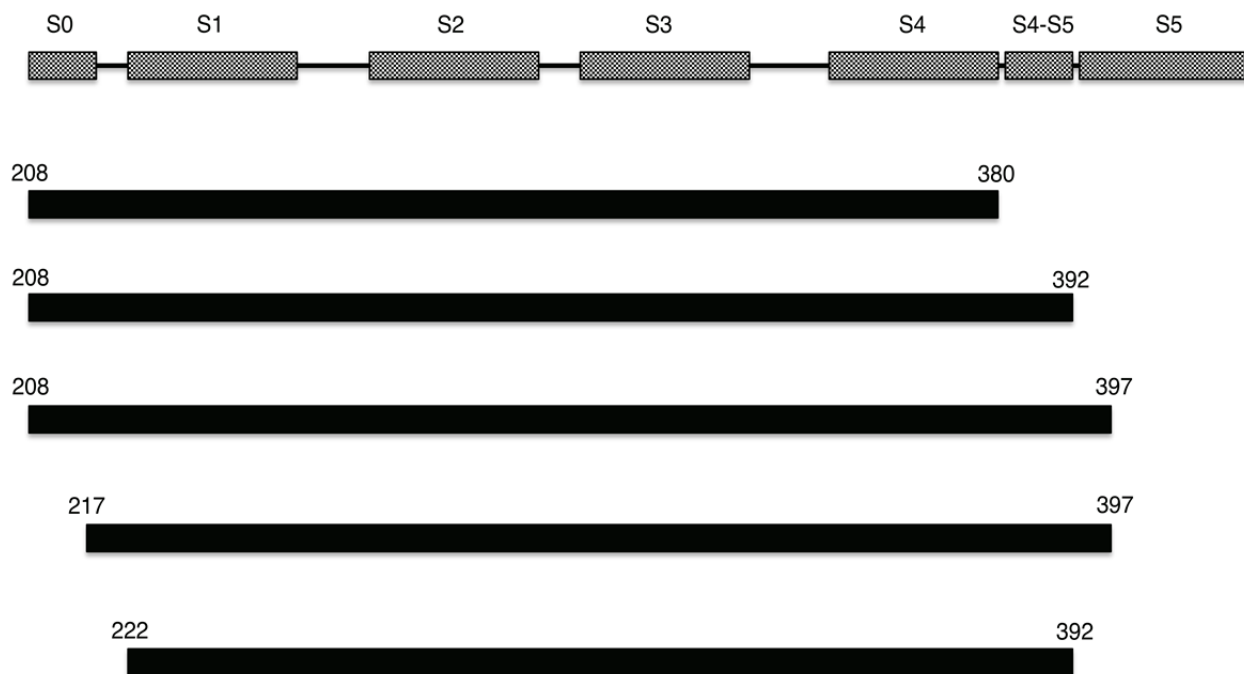

**Figure S1.** Constructs screened for optimizing Shaker-VSD expression. The highest expressing construct (217-397) was chosen for further NMR studies.

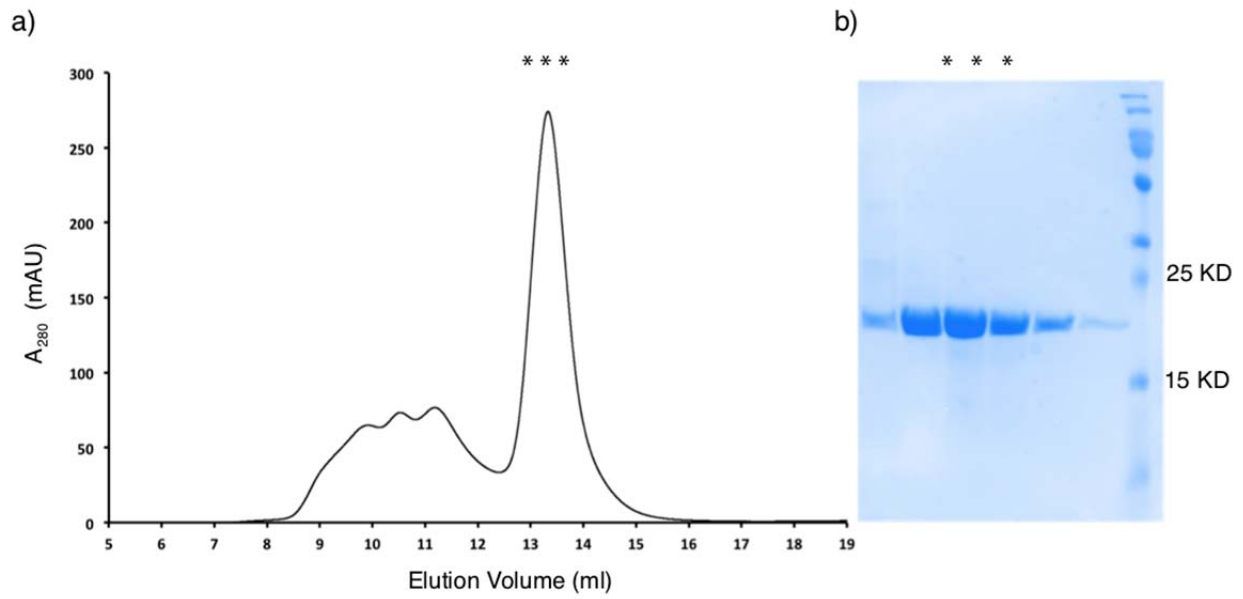

**Figure S2. Shaker-VSD purification.** (a) Representative gel filtration elution profile of the isolated Shaker-VSD in 0.2% LPPG on a Superdex 200 column. (b) SDS-PAGE gel of fractions from the main peak of the S200 elution profile for the isolated Shaker-VSD shows that the purified protein is a monomer with an apparent molecular mass near 20 kDa as expected.

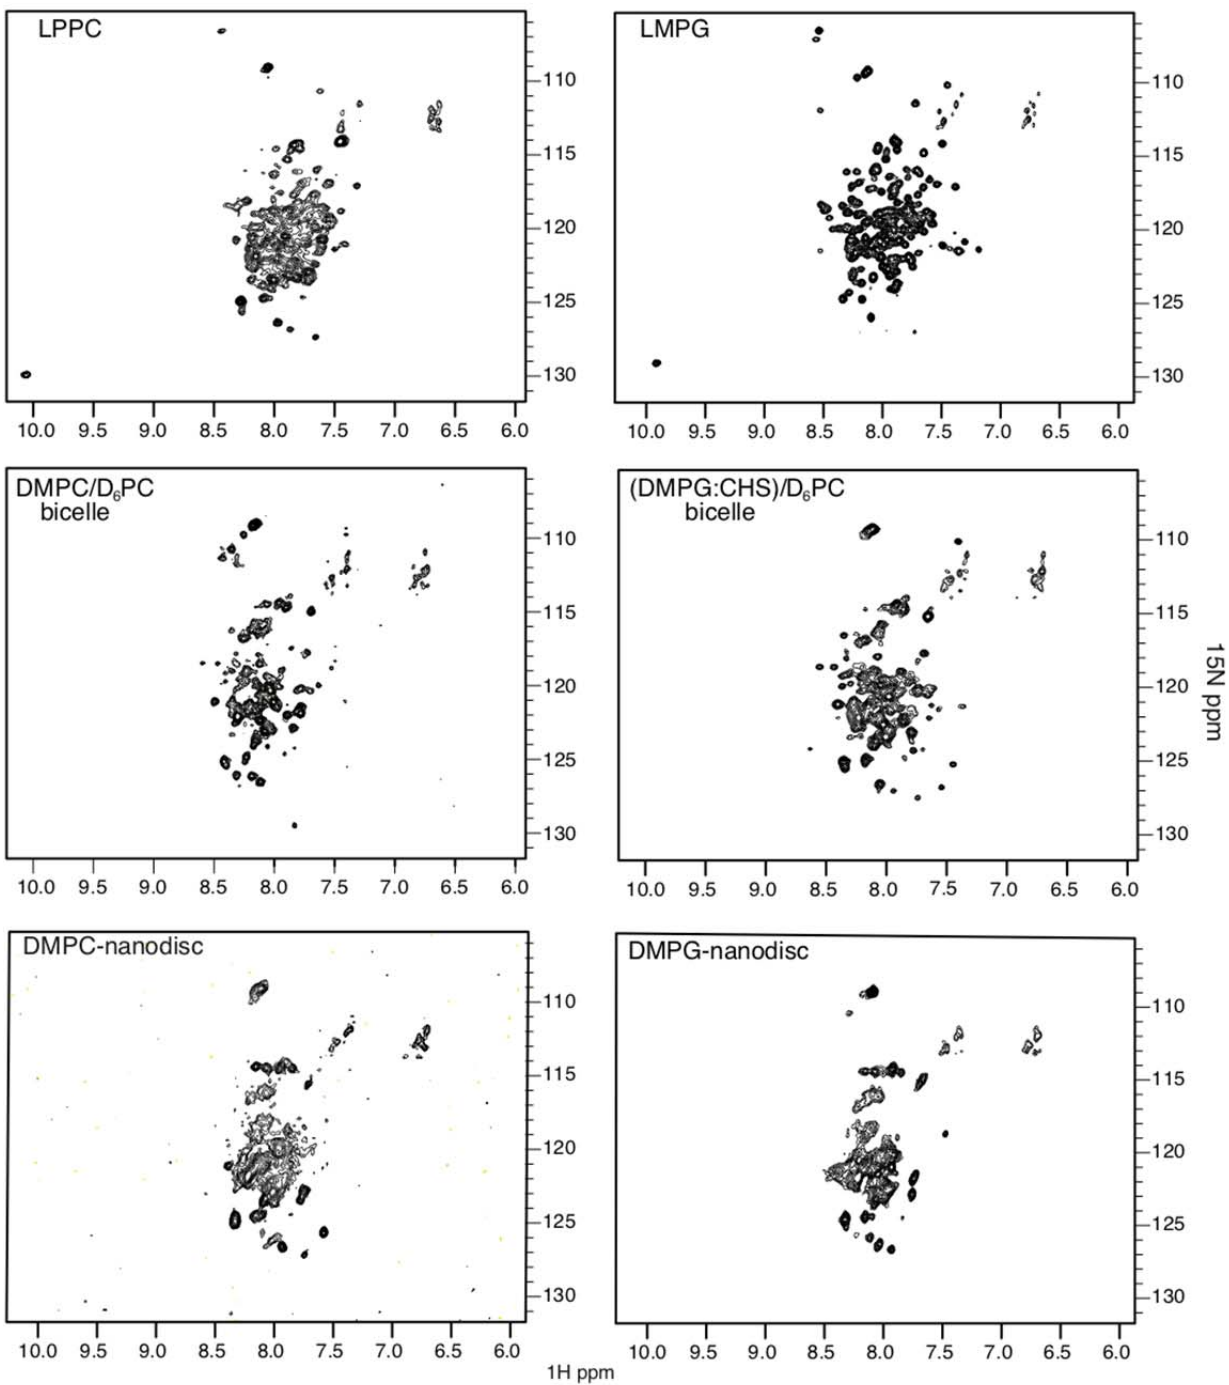

**Figure S3. Representative  $^1\text{H}$ - $^{15}\text{N}$  TROSY-HSQC spectra of the isolated Shaker-VSD at pH 7.0 in different membrane mimetics tested during NMR sample optimization. All spectra were acquired on a 750MHz Bruker magnet at 45 °C, except for the DMPC/D<sub>6</sub>PC bicelle sample, which was acquired at 37 °C.**

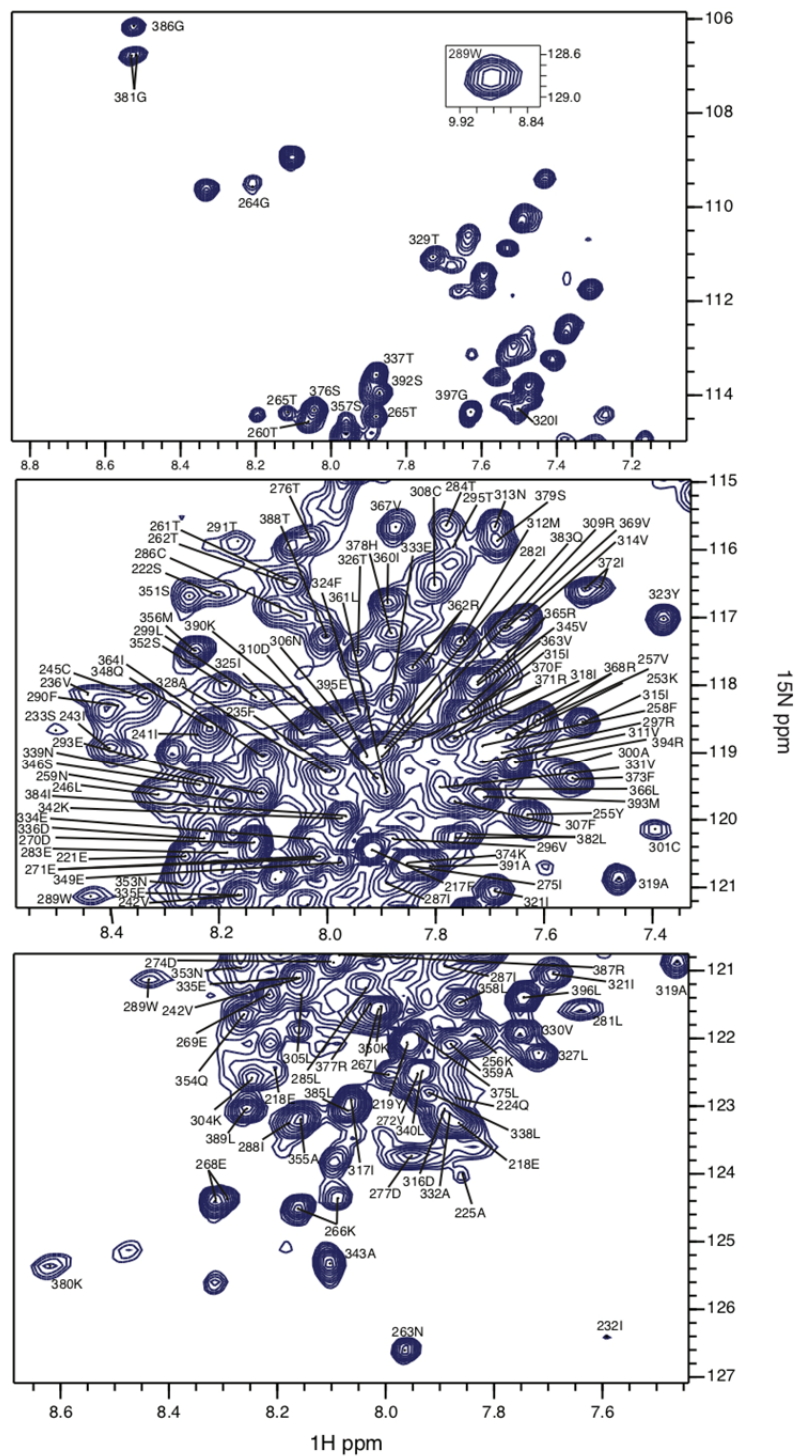

Figure S4.  $^1\text{H}$ - $^{15}\text{N}$  NMR chemical assignments of isolated Shaker-VSD at 45°C in 1.6% LPPG at pH 7.0.

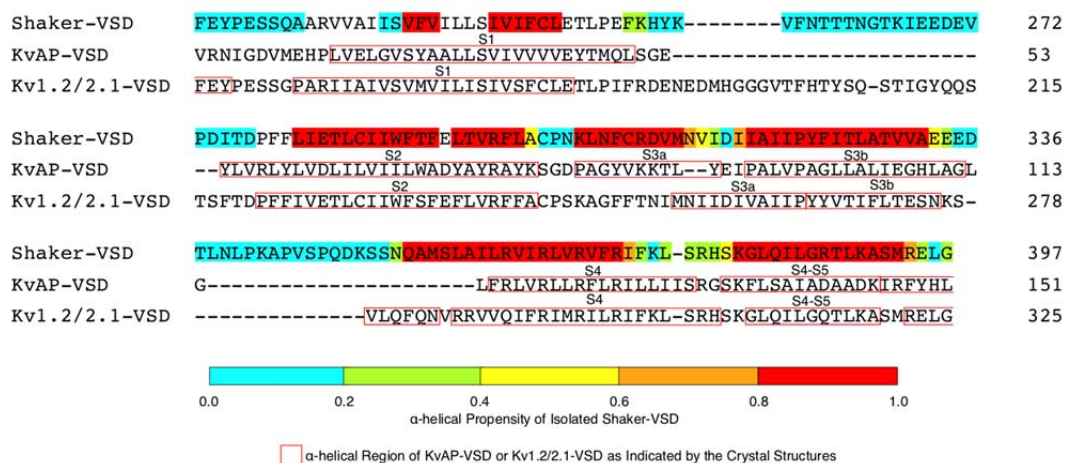

**Figure S5. Comparison of secondary structures of isolated Shaker-VSD, KvAP-VSD and Kv1.2/2.1-VSD.** The sequence of Shaker-VSD, KvAP-VSD and Kv1.2/2.1-VSD are aligned with Clustal Omega and manually adjusted. The  $\alpha$ -helical propensity of isolated Shaker-VSD based on its backbone chemical shifts as shown in Figure 2 is plotted on its sequence with a cyan to red color scale indicating the location of helical regions (0 indicating 0% tendency to form  $\alpha$  helix while 1 indicating 100% tendency). Residues in Shaker-VSD without color indicate lack of backbone assignment. Helical regions of KvAP-VSD and Kv1.2/2.1-VSD are marked with red rectangles based on their crystal structures (1ORQ and 2R9R) (1,2). The secondary structural features of isolated Shaker-VSD generally agrees with that of Kv1.2/2.1-VSD, except for S2-S3 linker and S3 transmembrane helix, which is more similar to KvAP-VSD.

a)

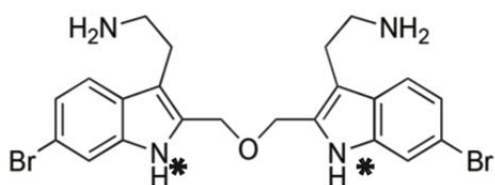

b)

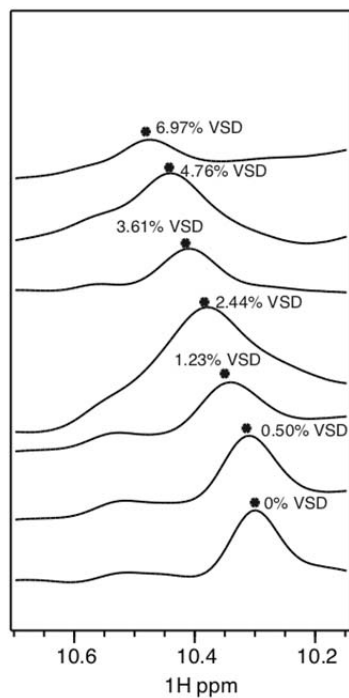

**Figure S6: NMR titration of BrET with Shaker-VSD.** (a) Structure of BrET with indole marked with \*. Stacked plot of 1D <sup>1</sup>H NMR spectra of BrET with increasing concentration of added Shaker-VSD in the region of 10ppm. The chemical shift change of the peak corresponding to the BrET indole proton (\*) upon Shaker-VSD titration shown in this figure was used to generate the binding curve in Fig. 3.

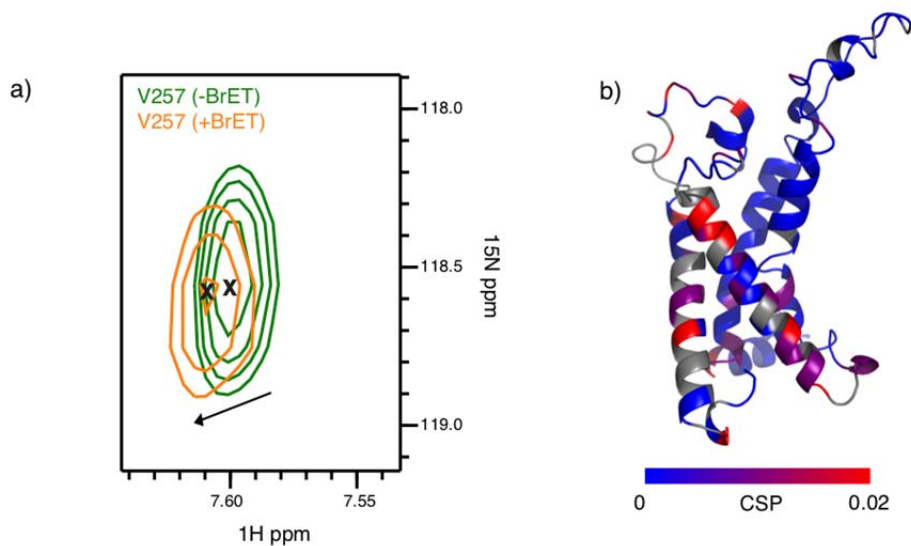

**Figure S7. Effect of BrET binding as observed from the NMR spectrum of Shaker-VSD.** (a) Overlay of the peak corresponding to Val257 in Shaker-VSD from a TROSY-HNCO spectrum without BrET (green) and with BrET (orange). The chemical shift perturbation is about 0.026. (b) Chemical shift perturbations are plotted on a homology model of isolated Shaker-VSD with a blue to red color scale. Small chemical shift perturbations are observed in many sites across the Shaker-VSD, suggesting that the protein undergoes a global conformational change upon binding.



**Figure S8. Residues of Shaker-VSD exhibiting peak doubling** in the well-resolved 3D TROSY-HNCO or TROSY-HNCA NMR spectra are highlighted in orange.

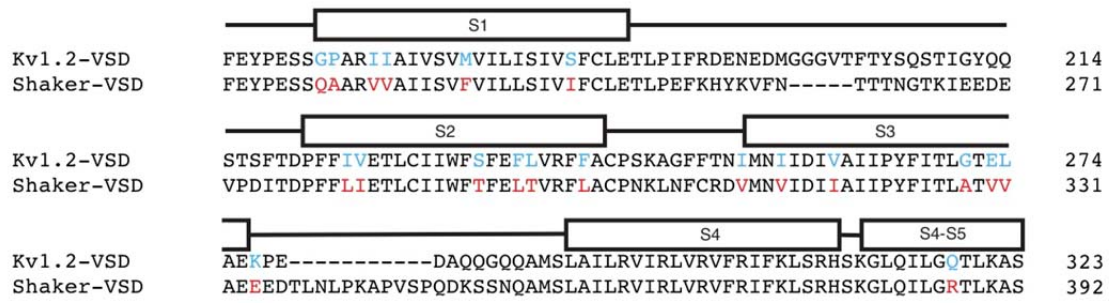

**Figure S9: Sequence alignment of Kv1.2-VSD and Shaker-VSD.** Residues in the transmembrane helices with different sequence are colored in red and blue.

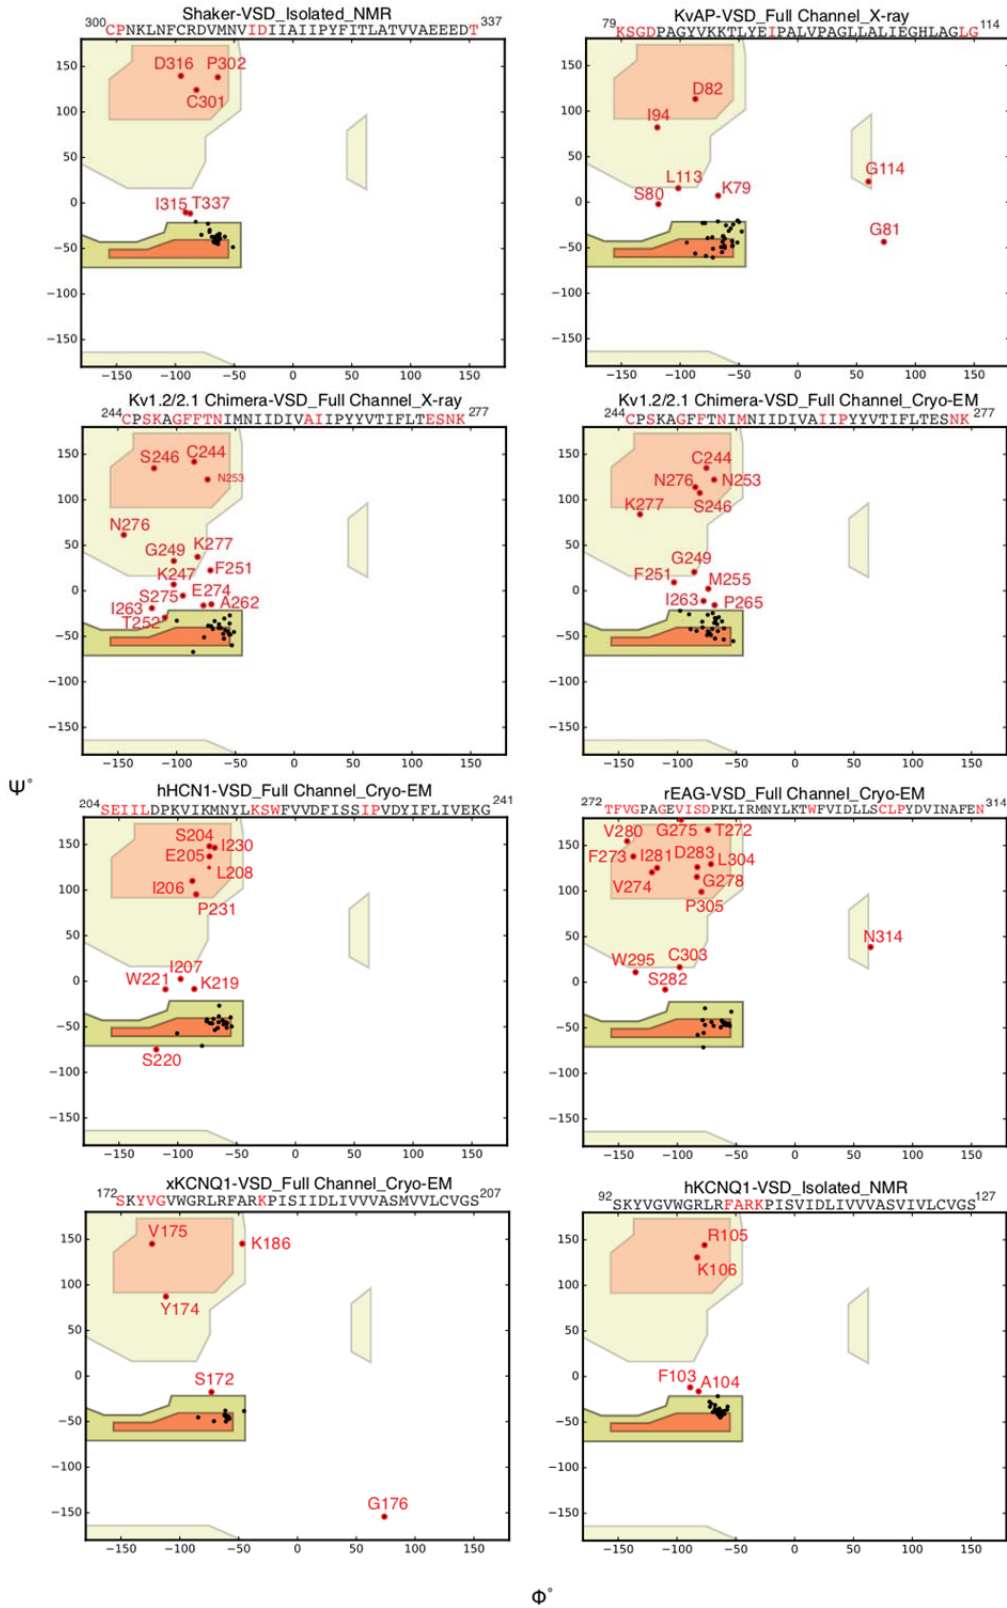

**Figure S10: Ramachandran plots of the backbone dihedral angles of the S2-S3 linker and S3 helix in different Kv-VSDs.** Backbone  $\phi$  and  $\psi$  angles are extracted from the deposited PDB structures and/or data in the following references: isolated Shaker-VSD (our NMR results); KvAP-VSD in full channel, X-ray (1ORQ) (1); Kv1.2/2.1-VSD in full channel, X-ray (2R9R) (2); Kv1.2/2.1-VSD in full channel, Cryo-EM (6EBK) (3); human KCNQ1-VSD, NMR (calculated with TALOS+ using backbone resonances assignment deposited in BMRB: 19708) (4); *Xenopus laevis* KCNQ1-VSD in full channel, cryo-EM (5VMS) (5); EAG-VSD in full channel, cryo-EM (5K7L) (6); HCN1-VSD in full channel, cryo-EM (5U6O) (7). The ramachandran plot is generated based on theoretical definition of backbone  $\phi$  and  $\psi$  angles in different secondary structural configurations (8), with intense color indicating right-handed helix (orange color indicating favored and yellow indicating allowed regions) and pale orange and pale yellow indicating favored and allowed regions for other secondary structures. Non-helical residues are labeled in red. These analyses were used to define the secondary structure configuration of Shaker-VSD in Figure 5.

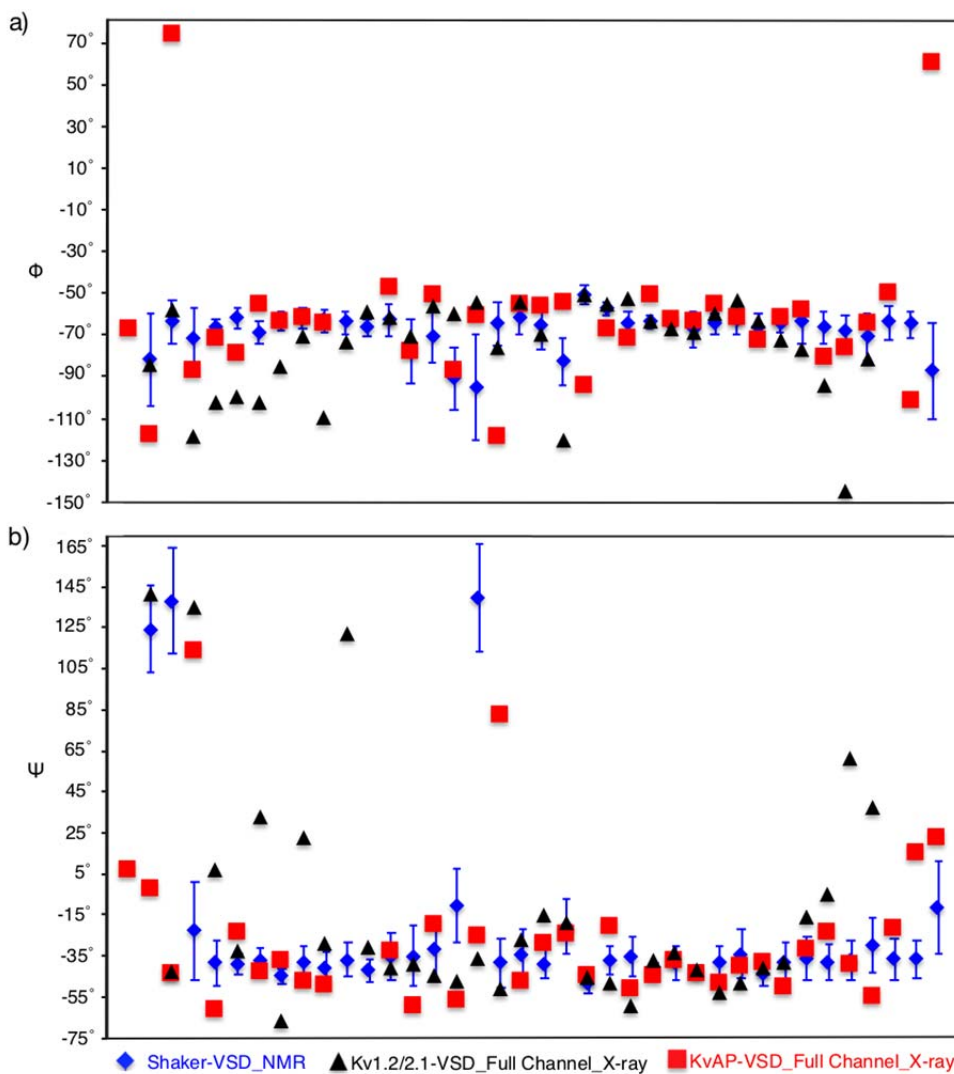

(301) -CPNKLNFCRDVMNVIDI I A I I P Y F I T L A T V V A E E E D T Shaker  
 (79) KSGDPAGYVKKTL--Y E I P A L V P A G L L A L I E G H L A G L G KvAP  
 (244) -CPSKAGFFTNI M N I I D I V A I I P Y Y V T I F L T E S N K --- Kv1.2/2.1

**Figure S11: Comparison of backbone dihedral angles of Shaker-VSD, full-length KvAP and Kv1.2/2.1 in the S2-S3 linker and S3 helix.** Backbone  $\phi$  and  $\psi$  angles are extracted from the deposited PDB structures and/or data in the following references: isolated Shaker-VSD (our NMR results); KvAP-VSD in full channel, X-ray (1ORQ) (1); Kv1.2/2.1-VSD in full channel, X-ray (2R9R) (2). The  $\phi$  and  $\psi$  angles distribution pattern of Shaker-VSD is more similar with that of full-length KvAP crystal structure than that full-length Kv1.2/2.1 crystal structure, indicating that some structural features of this region in Shaker-VSD might be more similar with that of KvAP.

**Table S1. Membrane mimetics screened for VSD Reconstitution**

| <b>Membrane Mimetics</b>  |                          | <b><sup>15</sup>N-<sup>1</sup>H HSQC Spectrum Quality</b> |                                                           |
|---------------------------|--------------------------|-----------------------------------------------------------|-----------------------------------------------------------|
| <b>Detergent Micelles</b> | DM                       | Aggregate                                                 |                                                           |
|                           | DDM                      | Failed to extract from membrane                           |                                                           |
|                           | OG                       | Failed to extract from membrane                           |                                                           |
|                           | CHAPS                    | Failed to extract from membrane                           |                                                           |
|                           | Foscholine-12            | Poor                                                      |                                                           |
|                           | LMPG                     | Great                                                     |                                                           |
|                           | LPPG                     | Great                                                     |                                                           |
|                           | LPPC                     | OK                                                        |                                                           |
|                           | LPPC:LPPG=1:1            | OK                                                        |                                                           |
|                           | LPPG:Chobimalt=4:1       | OK                                                        |                                                           |
| <b>Bicelles</b>           | <b>Long-chain Lipids</b> | <b>Short-chain Lipids</b>                                 | <b><sup>15</sup>N-<sup>1</sup>H HSQC Spectrum Quality</b> |
|                           | DMPC                     | D6PC                                                      | Poor                                                      |
|                           | DMPC:DMPG=3:1            | CHAPSO                                                    | Reconstitution failed                                     |
|                           | POPC:POPG=3:1            | D6PC                                                      | Poor                                                      |
|                           | POPC:POPA=3:1            | D6PC                                                      | Poor                                                      |
|                           | POPE:POPG=3:1            | D6PC                                                      | Poor                                                      |
|                           | DMPC:DMPA=3:1            | D6PC                                                      | Poor                                                      |
|                           | DMPG                     | D6PC                                                      | Poor                                                      |
|                           | DMPG:Cholesterol=9:1     | D6PC                                                      | OK                                                        |
|                           | DMPC:DMPA+1%PIP2         | D6PC                                                      | Poor                                                      |
|                           | DMPC:DMEPC=3:1           | D6PC                                                      | Poor                                                      |
|                           | DMPC:DMTAP=3:1           | D6PC                                                      | Poor                                                      |
|                           | DMPG:Cholesterol=9:1     | D7PC                                                      | OK                                                        |
|                           | DMPC:DMPA=3:1            | D7PC                                                      | Poor                                                      |
|                           | DPPC                     | D7PC                                                      | Poor                                                      |
|                           | DPPG                     | D7PC                                                      | Poor                                                      |
|                           | DPPC:Choleterol=9:1      | D7PC                                                      | Poor                                                      |
|                           | DPPG:Cholesterol=9:1     | D7PC                                                      | OK                                                        |
| <b>Nanodiscs</b>          | <b>Lipids</b>            | <b>Scaffold Protein</b>                                   | <b><sup>15</sup>N-<sup>1</sup>H HSQC Spectrum Quality</b> |
|                           | DMPC                     | MSP1D1ΔH5                                                 | Poor                                                      |
|                           | DMPG                     | MSP1D1ΔH5                                                 | Poor                                                      |
|                           | DMPC:DMPA=3:1            | MSP1D1ΔH5                                                 | Poor                                                      |
| <b>Amphipol</b>           | A8-35                    | Poor                                                      |                                                           |

## Supporting References:

1. Jiang, Y., Lee, A., Chen, J., Ruta, V., Cadene, M., Chait, B. T., and MacKinnon, R. (2003) X-ray structure of a voltage-dependent k<sup>+</sup> channel. *Nature* **423**, 33-41
2. Long, S. B., Tao, X., Campbell, E. B., and MacKinnon, R. (2007) Atomic structure of a voltage-dependent k<sup>+</sup> channel in a lipid membrane-like environment. *Nature* **450**, 376-382
3. Matthies, D., Bae, C., Toombes, G. E., Fox, T., Bartesaghi, A., Subramaniam, S., and Swartz, K. J. (2018) Single-particle cryo-em structure of a voltage-activated potassium channel in lipid nanodiscs. *Elife* **7**
4. Peng, D., Kim, J. H., Kroncke, B. M., Law, C. L., Xia, Y., Droege, K. D., Van Horn, W. D., Vanoye, C. G., and Sanders, C. R. (2014) Purification and structural study of the voltage-sensor domain of the human kcnq1 potassium ion channel. *Biochemistry* **53**, 2032-2042
5. Sun, J., and MacKinnon, R. (2017) Cryo-em structure of a kcnq1/cam complex reveals insights into congenital long qt syndrome. *Cell* **169**, 1042-1050 e1049
6. Whicher, J. R., and MacKinnon, R. (2016) Structure of the voltage-gated k(+) channel eag1 reveals an alternative voltage sensing mechanism. *Science* **353**, 664-669
7. Lee, C. H., and MacKinnon, R. (2017) Structures of the human hcn1 hyperpolarization-activated channel. *Cell* **168**, 111-120 e111
8. Ramachandran, G. N., Ramakrishnan, C., and Sasisekharan, V. (1963) Stereochemistry of polypeptide chain configurations. *J Mol Biol* **7**, 95-99
